# Supplementary material for: Effects of Soybean Meal Fermented by Enterococcus Faecium as a Replacement for Soybean Meal Could Improve the Growth Performance and Apparent Total Tract Digestibility by Modulating the Gut Microbiome of Weaning piglets
Source: Research Square preprint supplement (doi:10.21203/rs.3.rs-2245929/v1), 2022-11-19
Supplement: Supplementary file 1 [file 3d024fe4226f3435286caa33.docx]

| **Table S1.** compositions of soybean meal (SBM) and fermented soybean meal (FSBM) | | |
| --- | --- | --- |
| Item | SBM | FSBM |
| Crude protein (%)1 | 33.13±0.43b | 39.78±0.26a |
| Crude fiber, % | 4.00±96 | 4.08 ±56 |
| Crude Ash, % | 5.56±0.29 | 5.84±0.084 |
| KOH protein solubility (%) | 86.69±0.51a | 75.45±1.83b |
| TCA soluble protein (%) | 2.21±0.06b | 11.06±0.08a |
| Glycinin (mg/g)1 | 140.22±0.08a | 28.88±1.33b |
| β-conglycinin (mg/g)1 | 113.42±1.49a | 36.13±0.29b |
| Trypsin inhibitor (mg/g)1 | 11.16±0.4a | 0.33±0.02b |
| Stachyose (%) | 4.57±0.057a | 0.18±0.03b |
| Raffinose (%) | 2.81±0.16a | 0.54±0.03b |
| 1On a dry matter basis; a,b,. Means within rows with different letters differed  significantly (P < 0.05). The comparison was conducted in a horizontal manner | | |

Supplementary Tables

| **Table S2.** Composition of weaning pig diets. (as fed-basis) | | | | |
| --- | --- | --- | --- | --- |
| Item | Dietary treatments1Phase 1 (1 to 7) | | | |
| FSBM0 | FSBM3 | FSBM6 | FSBM9 |
| Ingredients (%) |  |  |  |  |
| Corn | 39.29 | 39.89 | 39.67 | 39.45 |
| Soybean meal | 22.18 | 20.06 | 17.64 | 15.22 |
| FSBM | - | 3.00 | 6.00 | 9.00 |
| Spray-dried plasma protein | 6.00 | 6.00 | 6.00 | 6.00 |
| Tallow | 0.78 | 1.36 | 1.02 | 0.69 |
| Coconut powder(60 % fat) | 2 | - | - | - |
| Lactose | 13.46 | 13.46 | 13.46 | 13.46 |
| Sugar | 2.00 | 2.00 | 2.00 | 2.00 |
| Whey protein | 11.00 | 11.00 | 11.00 | 11.00 |
| Monodicalcium phosphate | 1.40 | 1.38 | 1.38 | 1.38 |
| Limestone | 0.94 | 0.94 | 0.94 | 0.94 |
| Salt | 0.10 | 0.10 | 0.10 | 0.10 |
| Methionine (99%) | 0.19 | 0.18 | 0.18 | 0.17 |
| Lysine | 0.23 | 0.20 | 0.18 | 0.16 |
| Mineral mix1 | 0.20 | 0.20 | 0.20 | 0.20 |
| Vitamin mix2 | 0.20 | 0.20 | 0.20 | 0.20 |
| Choline (25%) | 0.03 | 0.03 | 0.03 | 0.03 |
| Total | 100.00 | 100.00 | 100.00 | 100.00 |
| Nutritional levels |  |  |  |  |
| Crude protein, % | 20.00 | 20.00 | 20.00 | 20.00 |
| ME, kcal/kg | 3400 | 3400 | 3400 | 3400 |
| Calcium, % | 0.80 | 0.80 | 0.80 | 0.80 |
| Available phosphorus, % | 0.70 | 0.70 | 0.70 | 0.70 |
| Lysine, % | 1.40 | 1.40 | 1.40 | 1.40 |
| Methionine, % | 0.45 | 0.45 | 0.45 | 0.45 |
| FAT, % | 3.82 | 3.72 | 3.95 | 4.2 |
| Lactose, % | 20.00 | 20.00 | 20.00 | 20.00 |
| 1FSBM0, FSBM3, FSBM6 and FSBM9 diets were made by substituting fermented soybean meal for 0%, 3%, 6% and 9% soybean meal. | | | | |
| 2Provided per kg diet: Fe, 100 mg as ferrous sulfate; Cu, 17 mg as copper sulfate; Mn, 17 mg as manganese oxide; I, 0.5 mg as potassium iodide; and Se, 0.3 mg as sodium selenite. | | | | |
| 3Provided per kilograms of diet: vitamin A, 10,800 IU; vitamin D3, 4,000 IU; vitamin E, 40 IU; vitamin K3, 4 mg; vitamin B1, 6 mg; vitamin B2, 12 mg; vitamin B6, 6 mg; vitamin B12, 0.05 mg; biotin, 0.2 mg; folic acid, 2 mg; niacin, 50 mg; D-calcium pantothenate, 25 mg. | | | | |

| **Table S3.** Composition of weaning pig diets (as fed-basis) | | | | |
| --- | --- | --- | --- | --- |
| Item | Dietary treatments1Phase 2 (8 to 21) | | | |
| FSBM0 | FSBM3 | FSBM6 | FSBM9 |
| Ingredients (%) |  |  |  |  |
| Corn | 54.75 | 55.34 | 55.1 | 54.91 |
| Soybean meal | 27.42 | 25.30 | 22.88 | 20.42 |
| FSBM | - | 3.00 | 6.00 | 9.00 |
| Spray-dried plasma protein | 1.50 | 1.50 | 1.50 | 1.50 |
| Tallow | 2.73 | 3.31 | 2.99 | 2.65 |
| Coconut powder(60 % fat) | 2.00 | - | - | - |
| Lactose | 3.89 | 3.89 | 3.89 | 3.89 |
| Sugar | 2.00 | 2.00 | 2.00 | 2.00 |
| Whey protein | 2.00 | 2.00 | 2.00 | 2.00 |
| Monodicalcium phosphate | 1.58 | 1.56 | 1.56 | 1.56 |
| Limestone | 0.98 | 0.99 | 0.99 | 0.99 |
| Salt | 0.10 | 0.10 | 0.10 | 0.10 |
| Methionine (99%) | 0.17 | 0.16 | 0.16 | 0.16 |
| Lysine | 0.45 | 0.42 | 0.4 | 0.39 |
| Mineral mix1 | 0.20 | 0.20 | 0.20 | 0.20 |
| Vitamin mix2 | 0.20 | 0.20 | 0.20 | 0.20 |
| Choline (25%) | 0.03 | 0.03 | 0.03 | 0.03 |
| Total | 100.00 | 100.00 | 100.00 | 100.00 |
| Nutritional levels |  |  |  |  |
| Crude protein, % | 19.50 | 19.50 | 19.50 | 19.50 |
| ME, kcal/kg | 3400 | 3400 | 3400 | 3400 |
| Calcium, % | 0.80 | 0.80 | 0.80 | 0.80 |
| Available phosphorus, % | 0.70 | 0.70 | 0.70 | 0.70 |
| Lysine, % | 1.40 | 1.40 | 1.40 | 1.40 |
| Methionine, % | 0.45 | 0.45 | 0.45 | 0.45 |
| FAT, % | 6.28 | 6.19 | 6.44 | 6.67 |
| Lactose, % | 4.98 | 4.98 | 4.98 | 4.98 |
| 1FSBM0, FSBM3, FSBM6 and FSBM9 diets were made by substituting fermented soybean meal for 0%, 3%, 6% and 9% soybean meal. | | | | |
| 2Provided per kg diet: Fe, 100 mg as ferrous sulfate; Cu, 17 mg as copper sulfate; Mn, 17 mg as manganese oxide; I, 0.5 mg as potassium iodide; and Se, 0.3 mg as sodium selenite. | | | | |
| 3Provided per kilograms of diet: vitamin A, 10,800 IU; vitamin D3, 4,000 IU; vitamin E, 40 IU; vitamin K3, 4 mg; vitamin B1, 6 mg; vitamin B2, 12 mg; vitamin B6, 6 mg; vitamin B12, 0.05 mg; biotin, 0.2 mg; folic acid, 2 mg; niacin, 50 mg; D-calcium pantothenate, 25 mg. | | | | |

| **Table S4.** Composition of weaning pig diets (as fed-basis) | | | | |
| --- | --- | --- | --- | --- |
| Item | Dietary treatments1Phase 3 (22 to 42) | | | |
| FSBM0 | FSBM3 | FSBM6 | FSBM9 |
| Ingredients (%) |  |  |  |  |
| Corn | 59.12 | 59.7 | 59.47 | 59.24 |
| Soybean meal | 28.32 | 26.18 | 23.76 | 21.34 |
| FSBM | - | 3.00 | 6.00 | 9.00 |
| Tallow | 2.00 | 2.60 | 2.27 | 1.94 |
| Coconut powder(60 % fat) | 2.00 | - | - | - |
| Lactose | 2.69 | 2.69 | 2.69 | 2.69 |
| Sugar | 2.00 | 2.00 | 2.00 | 2.00 |
| Monodicalcium phosphate | 1.64 | 1.64 | 1.64 | 1.64 |
| Limestone | 0.98 | 0.98 | 0.98 | 0.98 |
| Salt | 0.10 | 0.10 | 0.10 | 0.10 |
| Methionine (99%) | 0.17 | 0.16 | 0.16 | 0.16 |
| Lysine | 0.55 | 0.52 | 0.50 | 0.48 |
| Mineral mix2 | 0.20 | 0.20 | 0.20 | 0.20 |
| Vitamin mix3 | 0.20 | 0.20 | 0.20 | 0.20 |
| Choline (25%) | 0.03 | 0.03 | 0.03 | 0.03 |
| Total | 100.00 | 100.00 | 100.00 | 100.00 |
| Nutritional levels |  |  |  |  |
| Crude protein, % | 19.00 | 19.00 | 19.00 | 19.00 |
| ME, kcal/kg | 3350 | 3350 | 3350 | 3350 |
| Calcium, % | 0.80 | 0.80 | 0.80 | 0.80 |
| Available phosphorus, % | 0.70 | 0.70 | 0.70 | 0.70 |
| Lysine, % | 1.40 | 1.40 | 1.40 | 1.40 |
| Methionine, % | 0.45 | 0.45 | 0.45 | 0.45 |
| FAT, % | 5.72 | 5.64 | 5.88 | 6.12 |
| Lactose, % | 2.50 | 2.50 | 2.50 | 2.50 |
| 1FSBM0, FSBM3, FSBM6 and FSBM9 diets were made by substituting fermented soybean meal for 0%, 3%, 6% and 9% soybean meal. | | | | |
| 2Provided per kg diet: Fe, 100 mg as ferrous sulfate; Cu, 17 mg as copper sulfate; Mn, 17 mg as manganese oxide; I, 0.5 mg as potassium iodide; and Se, 0.3 mg as sodium selenite. | | | | |
| 3Provided per kilograms of diet: vitamin A, 10,800 IU; vitamin D3, 4,000 IU; vitamin E, 40 IU; vitamin K3, 4 mg; vitamin B1, 6 mg; vitamin B2, 12 mg; vitamin B6, 6 mg; vitamin B12, 0.05 mg; biotin, 0.2 mg; folic acid, 2 mg; niacin, 50 mg; D-calcium pantothenate, 25 mg. | | | | |
